# Supplementary material for: Inactivating mutations of the histone methyltransferase gene EZH2 in myeloid disorders
Source: Springer Nature journal article supplement (doi:10.1038/ng.621), 2010-07-04
Supplement: 41588_2010_BFng621_MOESM10_ESM.pdf [file 41588_2010_BFng621_MOESM10_ESM.pdf]

## SUPPLEMENTARY MATERIAL

### Inactivating mutations of the histone methyltransferase gene *EZH2* in myeloid disorders

Thomas Ernst<sup>1,2,3\*</sup>, Andrew J. Chase<sup>1,2\*</sup>, Joannah Score<sup>1,2</sup>, Claire E. Hidalgo-Curtis<sup>1,2</sup>,  
Catherine Bryant<sup>1,2</sup>, Amy Jones<sup>1,2</sup>, Katherine Waghorn<sup>1,2</sup>, Katerina Zoi<sup>4</sup>, Fiona Ross<sup>1,2</sup>,  
Andreas Reiter<sup>5</sup>, Andreas Hochhaus<sup>3</sup>, Hans G. Drexler<sup>6</sup>, Andrew Duncombe<sup>7</sup>, Francisco  
Cervantes<sup>8</sup>, David Oscier<sup>9</sup>, Jacqueline Boulton<sup>10</sup>, Francis H. Grand<sup>1,2</sup>, Nicholas C.P. Cross<sup>1,2</sup>

- 1 Human Genetics Division, School of Medicine, University of Southampton, UK
- 2 Wessex Regional Genetics Laboratory, Salisbury, UK
- 3 Klinik für Innere Medizin II, Universitätsklinikum Jena, Jena, Germany
- 4 Haematology Research Laboratory, Biomedical Research Foundation, Academy of Athens, Athens, Greece
- 5 III. Medizinische Universitätsklinik, Medizinische Fakultät für Klinische Medizin Mannheim der Universität Heidelberg, Mannheim, Germany
- 6 DSMZ-German Collection of Microorganisms and Cell Cultures, Braunschweig, Germany
- 7 Dept. of Haematology, Southampton General Hospital, Southampton, UK
- 8 Hematology Department, Hospital Clínic, IDIBAPs, University of Barcelona, Barcelona, Spain
- 9 Dept. of Haematology, Royal Bournemouth Hospital, Bournemouth, UK
- 10 LRF Molecular Haematology Unit, John Radcliffe Hospital, Oxford, UK

\* These authors contributed equally to this work

correspondence to:

Professor N.C.P.Cross  
Wessex Regional Genetics Laboratory  
Salisbury NHS Foundation Trust  
Salisbury SP2 8BJ, UK

Tel: +(44) 1722 429080  
Fax: +(44) 1722 338095  
email: [ncpc@soton.ac.uk](mailto:ncpc@soton.ac.uk)

**Supplementary Table 1.** Homozygous regions  $\geq 20\text{Mb}$  in 148 patients

| Patient ID | Disease   | Chr       | aUPD Localisation | Start (bp) | End (bp)  | aUPD size (Mb) |
|------------|-----------|-----------|-------------------|------------|-----------|----------------|
| #46*       | aCML      | <b>1</b>  | 1pter-1p13.3      | 1          | 108080000 | 108.08         |
| #47        | aCML      |           | 1pter-1p31.1      | 1          | 74760000  | 74.76          |
| #48        | MDS/MPN-U |           | 1pter-1p32.3      | 1          | 53110000  | 53.11          |
| #49        | MDS/MPN-U |           | 1pter-1p32.3      | 1          | 52962404  | 52.96          |
| #72*       | aCML      |           | 1q12-qter         | 143590000  | 247249719 | 103.66         |
| #41*       | CMML      |           | 1p22.2-1q24.2     | 91142736   | 165835065 | 74.69          |
| #50        | MDS/MPN-U | <b>3</b>  | 3p12.3-q13.12     | 77320000   | 108660000 | 31.34          |
| #51*       | aCML      |           | 3pter-3p24.1      | 4030000    | 29470000  | 25.44          |
| #51*       | aCML      | <b>4</b>  | 4pter-4p15.1      | 7220000    | 31297000  | 24.08          |
| #18        | aCML      |           | 4q13.1-qter       | 63780000   | 191273063 | 127.49         |
| #52*       | CMML      |           | 4q21.21-qter      | 79610000   | 191273063 | 111.66         |
| #53        | CMML      |           | 4q21.21-qter      | 79893419   | 191273063 | 111.38         |
| #54        | aCML      |           | 4q21.23-qter      | 85000000   | 191273063 | 106.27         |
| #10*       | CMML      |           | 4q22.1-qter       | 91310000   | 191273063 | 99.96          |
| #55        | CMML      |           | 4q22.1-qter       | 92952251   | 191273063 | 98.32          |
| #56*       | MDS/MPN-U |           | 4q22.1-q27        | 91566000   | 121860000 | 30.29          |
| #51*       | aCML      | <b>5</b>  | 5p14.1-q11.2      | 28700000   | 56780000  | 28.08          |
| #57        | CMML      |           | 5q11.2-5q35.3     | 54490000   | 180857866 | 126.37         |
| #58        | CMML      | <b>7</b>  | 7p11.2-q11.23     | 54926855   | 78029306  | 23.10          |
| #01        | CMML      |           | 7q11.1-qter       | 60000000   | 158821424 | 98.82          |
| #02        | MDS/MPN-U |           | 7q11.1-qter       | 60000000   | 158821424 | 98.82          |
| #03*       | aCML      |           | 7q11.22-qter      | 68679165   | 158821424 | 90.14          |
| #04        | aCML      |           | 7q11.23-qter      | 77996776   | 158821424 | 80.82          |
| #05*       | aCML      |           | 7q11.23-qter      | 76362317   | 158821424 | 82.46          |
| #06*       | CMML      |           | 7q21.13-qter      | 90317358   | 158821424 | 68.50          |
| #07        | MDS/MPN-U |           | 7q21.2-qter       | 92246265   | 158821424 | 66.58          |
| #08        | CMML      |           | 7q21.2-qter       | 92926362   | 158821424 | 65.90          |
| #09*       | CMML      |           | 7q21.3-qter       | 97302745   | 158821424 | 61.52          |
| #10*       | CMML      |           | 7q22.1-qter       | 98620286   | 158821424 | 60.20          |
| #11*       | MDS/MPN-U |           | 7q22.3-qter       | 106052801  | 158821424 | 52.77          |
| #12        | MDS/MPN-U |           | 7q22.3-qter       | 106721411  | 158821424 | 52.10          |
| #51*       | aCML      | <b>8</b>  | 8p21.2-pter       | 1          | 24930000  | 24.93          |
| #59        | MDS/MPN-U |           | 8q (whole arm)    | 43447222   | 146274826 | 102.83         |
| #60        | aCML      | <b>9</b>  | 9pter-9p21.1      | 1          | 29158821  | 29.16          |
| #61*       | CMML      |           | 9p21.1-q21        | 32300000   | 85200000  | 52.90          |
| #43        | CMML      | <b>10</b> | 10q21.2-10q23.1   | 62337850   | 82562647  | 20.22          |
| #62        | aCML      | <b>11</b> | 11pter-11p12      | 1          | 40810000  | 40.81          |
| #63        | aCML      |           | 11p13-p15.3       | 12253357   | 36517371  | 24.26          |
| #51*       | aCML      |           | 11p12-q13.5       | 39840000   | 75690000  | 35.85          |
| #46*       | aCML      |           | 11q13.1-qter      | 72920000   | 134452384 | 61.53          |
| #03*       | aCML      |           | 11q13.1-qter      | 68420000   | 134452384 | 66.03          |
| #64        | aCML      |           | 11q13.1-qter      | 67161596   | 134449982 | 67.29          |
| #65        | CMML      |           | 11q13.1-qter      | 65823569   | 134452384 | 68.63          |
| #15        | aCML      |           | 11q13.2-qter      | 77480000   | 134452384 | 56.97          |
| #05*       | aCML      |           | 11q13.3-qter      | 69950000   | 134452384 | 64.50          |
| #56*       | MDS/MPN-U |           | 11q12.1-14.3      | 57880000   | 91320000  | 33.44          |
| #57        | CMML      |           | 11p11.1-qter      | 49350000   | 134452384 | 85.10          |
| #67        | CMML      |           | 11q12-11q25       | 57941912   | 134452384 | 76.51          |

|             |           |           |                 |          |            |        |
|-------------|-----------|-----------|-----------------|----------|------------|--------|
| #41*        | CMML      |           | 11q13.1-11q25   | 65427086 | 134452384  | 69.03  |
| #09*        | CMML      | <b>12</b> | 12pter-12p11.1  | 1        | 37000000   | 37.00  |
| #52*        | CMML      |           | 12q13.11-qter   | 46960000 | 132349534  | 85.39  |
| #23         | aCML      | <b>13</b> | whole chr       | 1        | 114142980  | 114.14 |
| #68         | aCML      |           | 13q12.1-qter    | 20767952 | 114142980  | 93.38  |
| #19         | CMML      |           | 13q12.1-qter    | 21977125 | 114142980  | 92.17  |
| <b>#06*</b> | CMML      | <b>14</b> | 14q24.3-qter    | 73352955 | 106368585  | 33.02  |
| #69         | CMML      | <b>15</b> | 15q14-qter      | 36616462 | 100338915  | 63.72  |
| #61*        | CMML      | <b>17</b> | 17p12-q22       | 15100000 | 52170000   | 37.07  |
| #70         | CMML      |           | 17q11.2-17q25.3 | 24071616 | 78774742   | 54.70  |
| #71         | aCML      | <b>18</b> | 18q12.1-18q23   | 30600000 | 76117153   | 45.52  |
| #72*        | aCML      | <b>21</b> | 21q21.1-q22.2   | 1        | 38,869,972 | 38.87  |
| #73         | CMML      | <b>22</b> | whole chr       | 1        | 49691432   | 49.69  |
| <b>#11*</b> | MDS/MPN-U |           | whole chr       | 1        | 49691432   | 49.69  |
| <b>#33</b>  | CMML      |           | whole chr       | 1        | 49691432   | 49.69  |

Cases in bold indicate those with *EZH2* mutations. Asterisks indicate cases with  $\geq 2$  copy number neutral homozygous SNP calls  $>20\text{Mb}$

**Supplementary Table 2.** Genes on chromosome 7q screened by direct sequencing

| 7q gene       | Localisation | Genomic start | Genomic end | Coding exons | Screened exons |
|---------------|--------------|---------------|-------------|--------------|----------------|
| <i>CDK6</i>   | 7q21.2       | 92,072,175    | 92,301,148  | 2-8          | 3-8            |
| <i>SRPK2</i>  | 7q22.2       | 104,544,060   | 104,816,583 | 1-16         | 3-16           |
| <i>PIK3CG</i> | 7q22.3       | 106,293,160   | 106,334,801 | 2-11         | complete       |
| <i>HBP1</i>   | 7q22.3       | 106,596,696   | 106,630,209 | 2-11         | complete       |
| <i>HAKAI</i>  | 7q22.3       | 107,171,822   | 107,187,260 | 1-6          | complete       |
| <i>MET</i>    | 7q31.2       | 116,099,682   | 116,225,676 | 2-21         | complete       |
| <i>SMO</i>    | 7q32.1       | 128,615,949   | 128,640,617 | 1-12         | 2-12           |
| <i>UBE2H</i>  | 7q32.2       | 129,260,231   | 129,380,025 | 2-7          | complete       |
| <i>HIPK2</i>  | 7q34         | 138,907,915   | 139,123,984 | 1-15         | complete       |
| <i>BRAF</i>   | 7q34         | 140,080,751   | 140,271,033 | 1-18         | 2-18           |
| <i>EPHB6</i>  | 7q34         | 142,262,914   | 142,278,967 | 5-20         | complete       |
| <i>EPHA1</i>  | 7q35         | 142,798,331   | 142,816,107 | 1-18         | complete       |
| <i>CUL1</i>   | 7q36.1       | 148,026,866   | 148,129,134 | 2-22         | complete       |
| <i>GIMAP7</i> | 7q36.1       | 149,842,878   | 149,849,093 | 2            | complete       |
| <i>NUB1</i>   | 7q36.1       | 150,669,791   | 150,706,463 | 2-15         | complete       |

**Supplementary Table 3.** Summary of all *EZH2* mutations

| Case | Diagnosis  | Karyotype        | SNP 6.0 array |                   | <i>EZH2</i> mutation           |                           | Zygoty | <i>EZH2</i> exon |
|------|------------|------------------|---------------|-------------------|--------------------------------|---------------------------|--------|------------------|
|      |            |                  | aUPD          | del 7q36.1        | nucleotide                     | protein                   |        |                  |
| #01  | CMML       | n/a              | 7q11.1-qter   | no                | c.2054delA                     | p.Lys685fsX11             | Hom    | 18               |
| #03  | aCML       | 46,XX            | 7q11.22-qter  | no                | c.982C>T                       | p.Gln328X                 | Hom    | 9                |
| #04  | aCML       | n/a              | 7q11.23-qter  | no                | c.1992T>G                      | p.Asp664Glu               | Hom    | 17               |
| #05  | aCML       | n/a              | 7q11.23-qter  | no                | c.863G>A                       | p.Arg288Gln               | Hom    | 8                |
| #06  | CMML       | 46,XY            | 7q21.13-qter  | no                | intron delA (2bp prior exon 8) | splice mutation           | Hom    | 8                |
| #07  | MDS/MPN-U  | +8               | 7q21.2-qter   | no                | c.2187dupT                     | p.Asp730X                 | Hom    | 19               |
| #08  | CMML       | t(3;11)(p13;p15) | 7q21.2-qter   | no                | c.619C>T                       | p.Arg207X                 | Hom    | 6                |
| #11  | MDS/MPN-U  | 46,XX            | 7q22.3-qter   | no                | c.1728C>G                      | p.Cys576Trp               | Hom    | 15               |
| #12  | MDS/MPN-U  | 46,XY            | 7q22.3-qter   | no                | c.1992T>A                      | p.Asp664Glu               | Hom    | 17               |
| #13  | aCML       | 46,XY            | n/a           | n/a               | c.786_787het_insC              | p.Asn263fsX7              | Het    | 8                |
| #14  | CMML       | 46,XY            | n/a           | n/a               | c.73C>T + c.1691het_delG       | p.Arg25X + p.Gly564fsX110 | Het    | 2, 15            |
| #15  | aCML       | n/a              | no            | no                | c.2068C>T                      | p.Arg690Cys               | Het    | 18               |
| #16  | post-ET MF | -7               | n/a           | n/a               | c.2050C>T                      | p.Arg684Cys               | Hom    | 18               |
| #17  | aCML       | n/a              | no            | 400kb del(7q36.1) | c.1200_1203delAGAA             | p.Lys400fsX22             | Hom    | 10               |
| #18  | aCML       | 46,XY            | no            | no                | c.188_189het_insA              | p.Arg63fsX18              | Het    | 3                |
| #19  | CMML       | 46,XY            | no            | no                | c.574G>A                       | p.Asp192Asn               | Het    | 6                |
| #20  | PMF        | n/a              | n/a           | n/a               | c.2079T>A                      | p.Asn693Lys               | Het    | 18               |
| #21  | PMF        | 46,XY            | n/a           | n/a               | c.2199C>A                      | p.Tyr733X                 | Het    | 20               |

|        |                 |                                                 |     |     |                                                   |                                     |     |        |
|--------|-----------------|-------------------------------------------------|-----|-----|---------------------------------------------------|-------------------------------------|-----|--------|
| #22    | PV              | 46,XX                                           | n/a | n/a | c.1033G>A                                         | p.Ala345Thr                         | Het | 10     |
| #23    | aCML            | 46,XY                                           | no  | no  | c.754C>G                                          | p.Leu252Val                         | Het | 8      |
| #24    | CMML            | n/a                                             | n/a | n/a | c.2138T>C                                         | p.Ile713Thr                         | Het | 19     |
| #25    | CMML            | 46,XX                                           | no  | no  | c.1992_1997het_delTAAATA +<br>c.2187_2188het_insT | p.del(Lys665+Tyr666) +<br>p.Asp730X | Het | 17, 19 |
| #26    | HES             | n/a                                             | n/a | n/a | c.727A>C                                          | p.Lys243Gln                         | Het | 7      |
| #27    | post-ET MF      | 46,XY                                           | n/a | n/a | c.2069G>A                                         | p.Arg690His                         | Hom | 18     |
| #28    | aCML            | 46,XY,<br>del(12)(p11.2),del(12<br>) (q13q24.1) | no  | no  | c.763G>A                                          | p.Ala255Thr                         | Het | 8      |
| #29    | CMML            | 45,X-Y                                          | n/a | n/a | c.444_445het_insGAA +<br>c.2050C>T                | p.ins_Glu149 +<br>p.Arg684Cys       | Het | 5,18   |
| #30    | 5q-<br>syndrome | 46,XY, del (5)(q14.3-<br>q33.3)                 | n/a | n/a | c.1966het_delG                                    | p.Ala656fsX18                       | Het | 17     |
| #31    | RAEB-1          | 47XY, +8                                        | n/a | n/a | c.745G>A + c.1967C>T                              | p.Glu249Lys + p.Ala656Val           | Het | 8, 17  |
| #32    | CMML            | 46,XY                                           | n/a | n/a | c.755_756het_insC                                 | p.Leu252fsX7                        | Het | 8      |
| #33    | CMML            | 46,XY,<br>t(2;12)(q31;p13)/47,i<br>dem,+21      | no  | no  | c.2191T>G                                         | p.Tyr731Asp                         | Het | 19     |
| #34    | CMML            | 46,XX                                           | no  | no  | c.172C>T + c.1712G>A                              | p.Gln58X + p.Cys571Tyr              | Het | 3, 15  |
| #35    | RA              | n/a                                             | n/a | n/a | c.730T>G + c.890A>G                               | p.Tyr244Asp +<br>p.His297Arg        | Het | 8, 8   |
| #36    | RA              | 8+                                              | n/a | n/a | c.216_217het_delTT +<br>c.1978G>C                 | p.Thr72fsX8 + p.Gly660Arg           | Het | 3, 17  |
| #37    | RA              | 46,XX                                           | n/a | n/a | c.434T>G                                          | p.Phe145Cys                         | Het | 5      |
| #38    | CMML            | 46, XY,-7,+21                                   | no  | no  | c.1175_1176het_delAA                              | p.Glu392fsX6                        | Hom | 10     |
| #39    | RARS-T          | n/a                                             | n/a | n/a | c.1774_1777het_delACTT                            | p.Thr592fsX82                       | Het | 15     |
| #40    | CMML            | 47,XY,+8                                        | no  | no  | c.965A>G                                          | p.Asn322Ser                         | Het | 9      |
| #41    | CMML            | 46,XY                                           | no  | no  | c.1991A>T                                         | p.Asp664Val                         | Het | 17     |
| #42    | RA              | 46,XX                                           | n/a | n/a | c.2078A>T                                         | p.Asn693Ile                         | Hom | 18     |
| #43    | CMML            | 47,XX,+8                                        | no  | no  | c.949G>T                                          | p.Glu317X                           | Het | 9      |
| #44    | RA              | 46,XY                                           | n/a | n/a | c.1513het_delG                                    | p.Ala505fsX8                        | Het | 13     |
| #45    | RAEB-1          | 45,XY,-7 [18] /46,XY                            | n/a | n/a | c.184C>T                                          | p.Gln62X                            | Het | 3      |
| ELF153 | Cell line       | 43,XY,-7,-14,-17,                               | no  | no  | c.1525A>G                                         | p.Arg509Gly                         | Hom | 13     |

|       |           |                                                                                                                                                         |    |    |           |             |     |    |
|-------|-----------|---------------------------------------------------------------------------------------------------------------------------------------------------------|----|----|-----------|-------------|-----|----|
|       |           | de1(5)(q13q31),<br>t(12;14)(p11.2;q11.2                                                                                                                 |    |    |           |             |     |    |
| SKM-1 | Cell line | hypodiploid with 8%<br>polyploidy; 43(38-43)<br><2n>XY, +1, -12, -14,<br>-20, -21,<br>t(1;19)(q21;q13),<br>del(2)(p11),<br>del(9)(q12),<br>add(17)(p1?) | no | no | c.1937A>G | p.Tyr646Cys | Hom | 16 |

n/a, not available or failed

**Supplementary Table 4.** Cell lines screened for *EZH2* mutations

| <b>Number</b> | <b>Cell line</b> | <b><i>EZH2</i> status</b> |
|---------------|------------------|---------------------------|
| 1             | FKH1             | normal                    |
| 2             | MONOMAC6         | normal                    |
| 3             | UT7              | normal                    |
| 4             | MOLM13           | normal                    |
| 5             | CNLBC1           | normal                    |
| 6             | ELF153           | R509G                     |
| 7             | F-36P            | normal                    |
| 8             | MARIMO           | normal                    |
| 9             | MB-02            | normal                    |
| 10            | MDS-92           | normal                    |
| 11            | MOLM-17          | normal                    |
| 12            | MUTZ-8           | normal                    |
| 13            | MUTZ-11          | normal                    |
| 14            | OCI-M2           | normal                    |
| 15            | SKK-1            | normal                    |
| 16            | SKM-1            | Y646C                     |
| 17            | K562             | normal                    |
| 18            | HL60             | normal                    |
| 19            | U937             | normal                    |
| 20            | SIG-M5           | normal                    |
| 21            | KMOE-2           | normal                    |



**Supplementary Table 5. Primer sequences**

**A. EZH2 mutation screening**

| Exon | Forward primer            | Reverse primer              | Product length (bp) |
|------|---------------------------|-----------------------------|---------------------|
| 2    | GGTGATCATATTCAGGCTGG      | AAACTTATTGAACTTAGGAGGGG     | 257                 |
| 3    | TTTCTCCTTTCTCCTTCA        | TCCAATAGCATAAACCAAAGATG     | 251                 |
| 4    | GGCTACAGCTTAAGGTTGTCCT    | CTGTCTTGATTACCTTGACAAT      | 270                 |
| 5    | AAATCTGGAGAAGCTGGGTAAAGAC | TCATGCCCTATATGCTTCATAAAC    | 316                 |
| 6    | AGGCTATGCCTGTTTTGTCC      | AAAAGAGAAAGAAGAACTAAGCCC    | 332                 |
| 7    | CTGACTGGCATTCCACAGAC      | AAGTGAGTGGCTCATCCGC         | 380                 |
| 8    | CATCAAAGTAACACATGGAAACC   | TTGTAATAAATGATAGCACTCTCCAAG | 348                 |
| 9    | TCCATTAATTGACTTTTCCAGTG   | ACCTCCACCAAAGTGCAAAG        | 246                 |
| 10   | TTCTCTCCATCAAATGAGTTTTAG  | TCCTCACAACACGAACTTTCAC      | 360                 |
| 11   | GAGTTGTCCTCATCTTTTCGC     | CCAAGAATTTTCTTTGTTTGGAC     | 362                 |
| 12   | AAGAATGGTTTGCCTAAATAAGAC  | CCTTGCCTGCAGTGTCTATC        | 212                 |
| 13   | TCTTGGCTTTAACGCATTCC      | CAAATTGGTTTAACATACAGAAGGC   | 289                 |
| 14   | TGATCGTTTCCATCTCCCTG      | AGGGAGTGCTCCCATGTTC         | 278                 |
| 15   | GAGAGTCAGTGAGATGCCAG      | TTTGCCCCAGCTAAATCATC        | 371                 |
| 16   | TTTTTGATGATGTGATTGTGTTTT  | TGGCAATTCATTTCCAATCA        | 239                 |
| 17   | TTCTGTCAGGCTTGATCACC      | CTCGTTTCTGAACACTCGGC        | 220                 |
| 18   | AGGCAAACCCTGAAGAAGT       | TTCCAATTCTCACGTCAAAGGTA     | 217                 |
| 19   | CCGTCTTCATGCTCACTGAC      | AAAAACCCTCCTTTGTCCAGA       | 204                 |
| 20   | CTTCAGCAGGCTTTGTTGTG      | GGGGAGGAGGTAGCAGATG         | 163                 |

**B. EZH2 SNP Pyrosequencing**

EZH2\_rs10488070\_F TTC CCT CAA GGT CAT GCA ATG TA  
 EZH2\_rs10488070\_R [Btn]ACT GAA GCA TGT GTT CTT GAC TTG  
 EZH2\_rs10488070\_SEQ AAG GAC TTC TAT CAA CAT TT

EZH2\_rs6464926\_F [Btn]AAT GGT GGT GCA TGC TTG TA  
 EZH2\_rs6464926\_R TTT GGG TTT CTC AAC ATT GTG T  
 EZH2\_rs6464926\_SEQ CCT TTA GTC TAT TCA TGA GG

EZH2\_rs740949\_F [Btn]CTA ATT CCC CAC TAA TGC TCA TG  
 EZH2\_rs740949\_R TCT CTA AGG GCT TTT TCT ACT GGA  
 EZH2\_rs740949\_SEQ GTT CTT TGC TTC TTT TGA

[Btn] = biotin

### C. RT-PCR

|                |                             |
|----------------|-----------------------------|
| Ex6B cDNA_F    | TTTATAAATGATGAAATTTTTGTGGAG |
| Ex9 cDNA_R     | AAATGCTGGTAACACTGTGGTC      |
| Exon 15 cDNA_F | ATTCAGCGGGGCTCCAAAAA        |
| Exon 19 cDNA_R | TCGCCAGTCTGGATGGCTCT        |

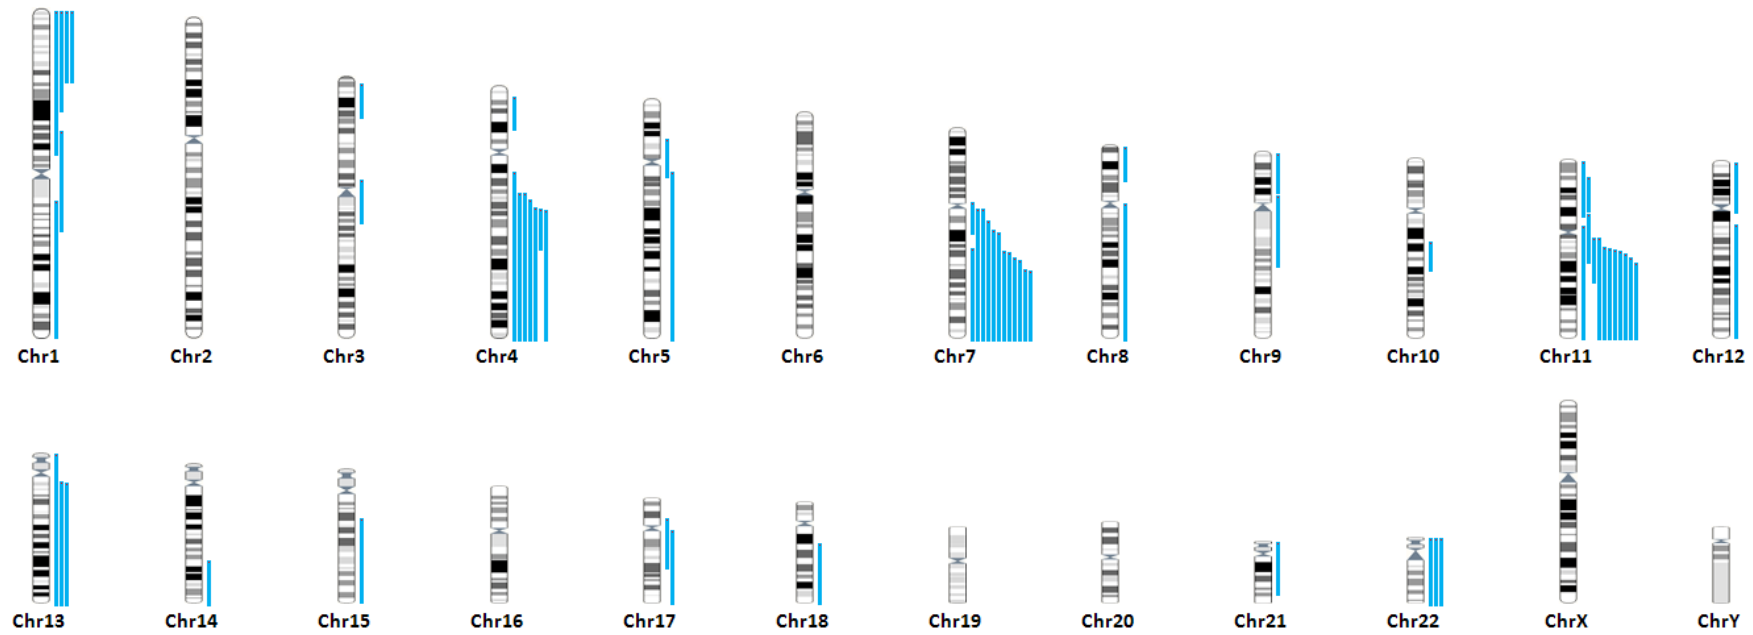

**Supplementary Figure 1.** Summary of acquired UPD. Copy number neutral homozygous SNP calls >20Mb in size are shown in the cohort of 148 cases. Analysis was performed by SNP 6.0 arrays and CNAG (version 3.2) using the AsCNAR algorithm and anonymous reference samples

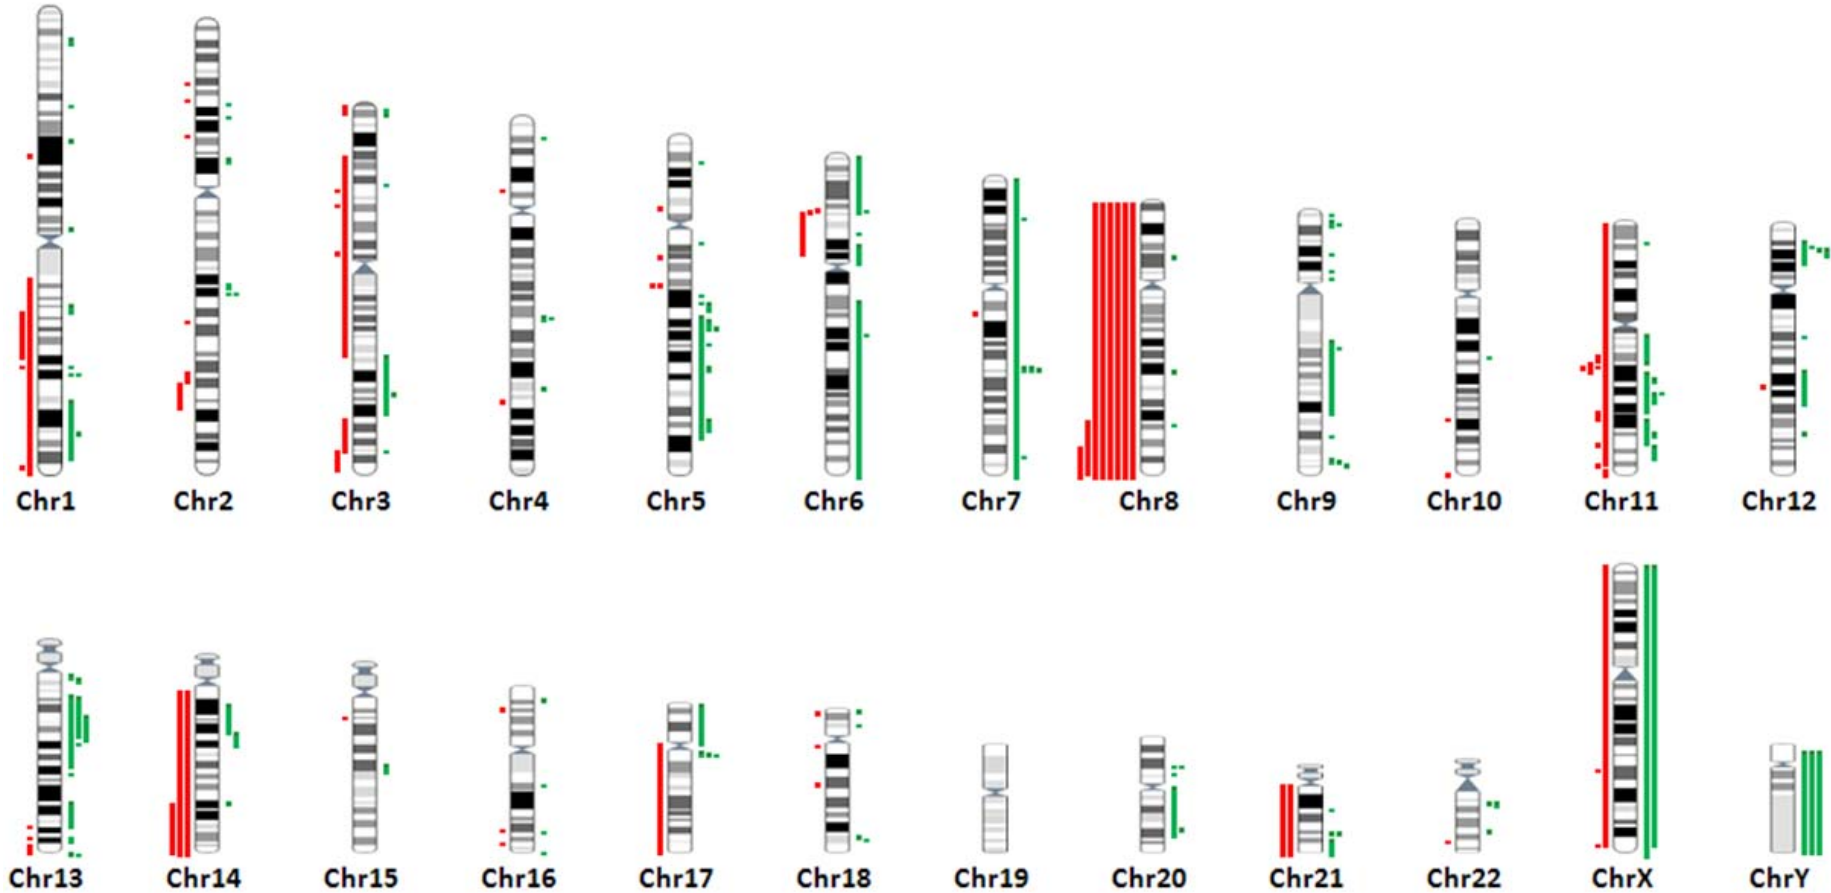

**Supplementary Figure 2.** Copy number changes. Gains (red) and losses (green) in the same cohort are shown. Only those changes detected by the Partek Genomics Suite (version 6.5 beta) and verified by CNAG using anonymous references and the Hidden Markov Model algorithm are shown.

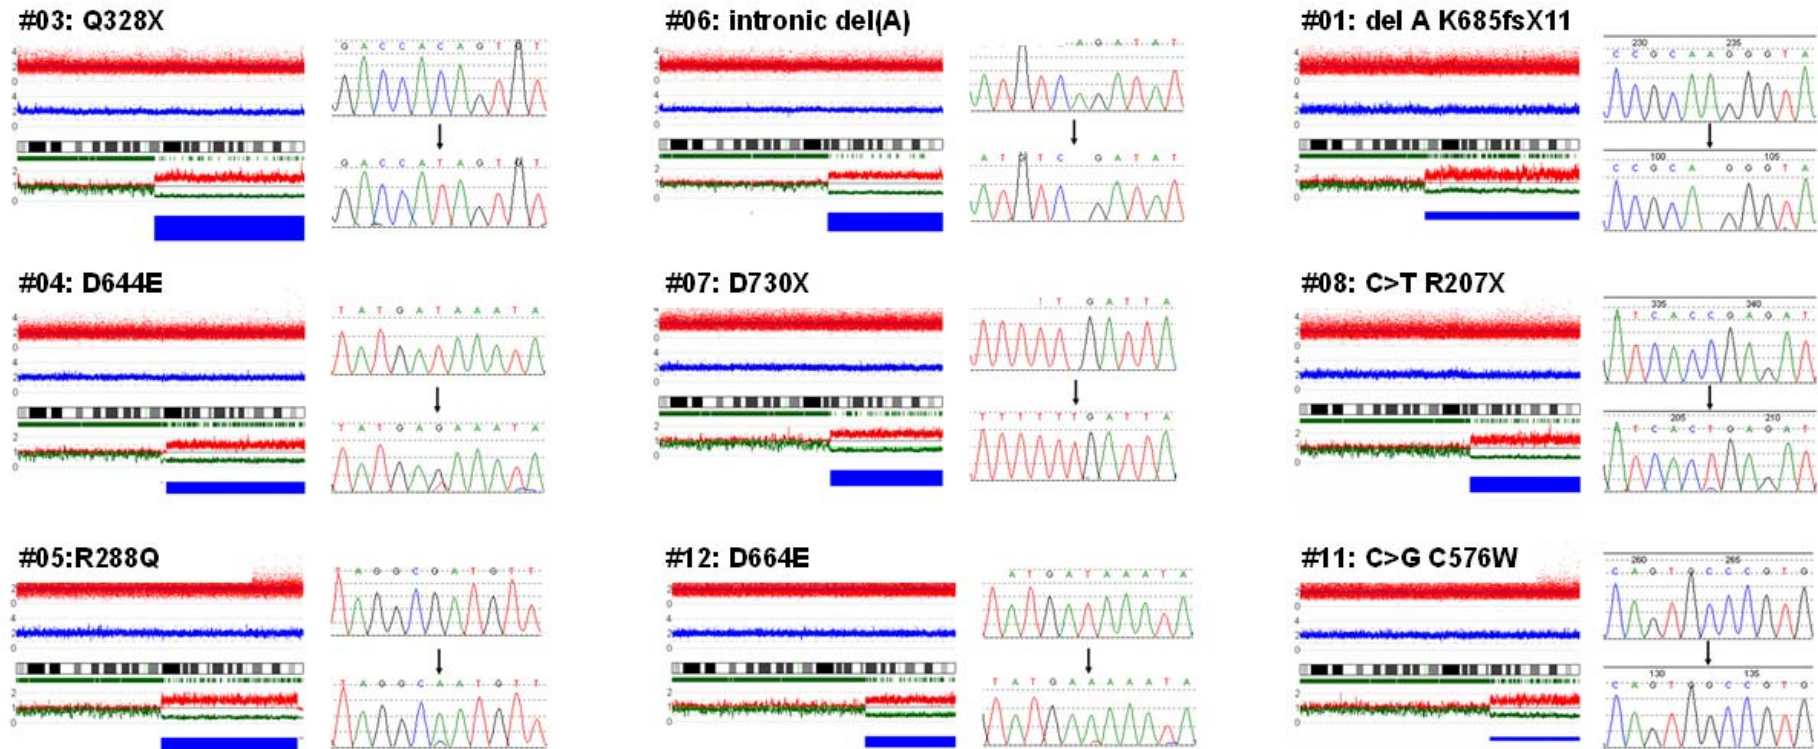

**Supplementary Figure 3.** *EZH2* mutations are associated with aUPD. Regions of aUPD and associated sequence changes for all nine mutated cases. The left panels show the copy number calls (red dots), averaged copy number calls (blue traces), allele-specific copy number calls (red and green traces). Acquired UPD is indicated by the solid blue bars and corresponds to divergence of the allele-specific copy number calls.

#03: C>T (Q328X)

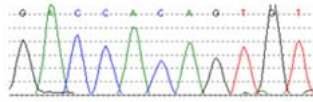

T-cells

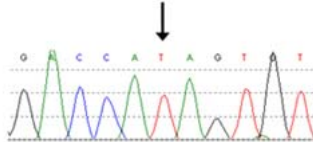

Granulocytes

#30: del G (A656fsX18)

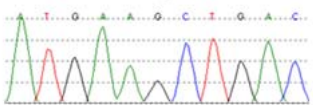

T-cells

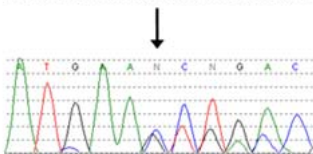

Granulocytes

#31: G>A (E249K)

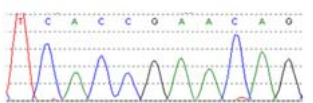

T-cells

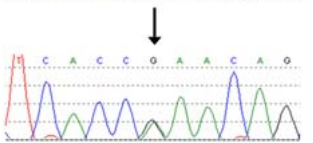

Granulocytes

#29: ins\_E149

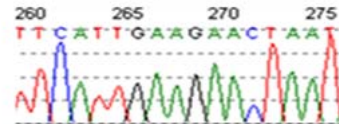

T-cells

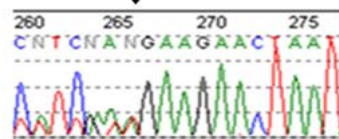

PB

#29: R684C

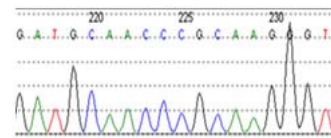

T-cells

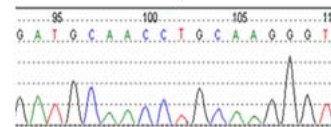

PB

**Supplementary Figure 4.** *EZH2* mutations are acquired. Analysis of peripheral blood leukocytes (PB), granulocytes and T-cells demonstrates that 5 of 5 *EZH2* mutations tested were somatically acquired.

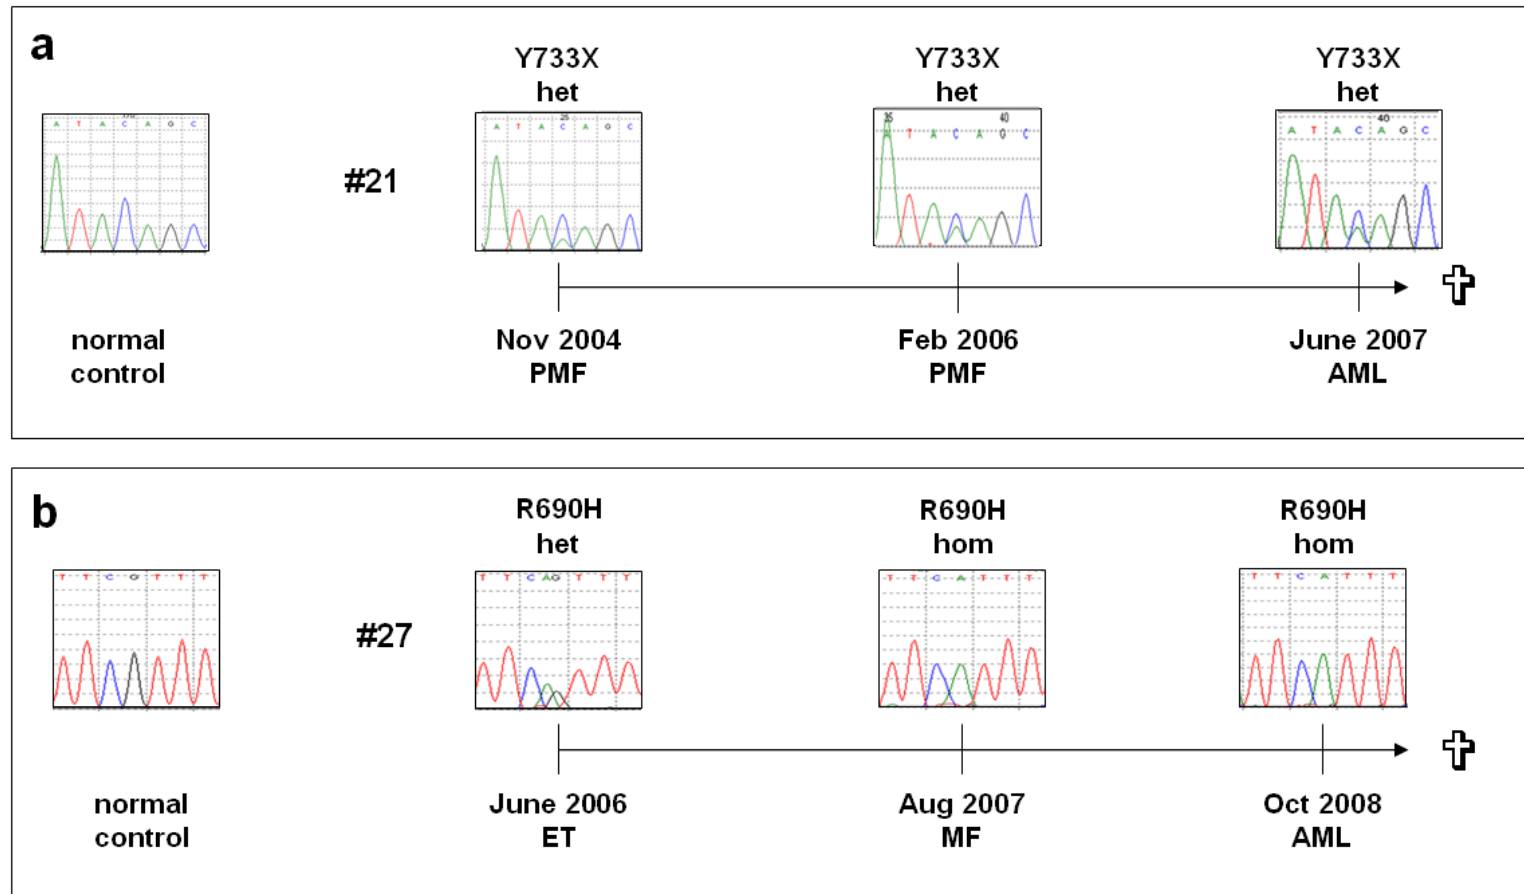

**Supplementary Figure 5.** Sequential analysis of *EZH2* mutations. (a) Case #21 presented in November 2004 with PMF, a normal karyotype and a relatively low level heterozygous c.2199C>A (Y733X) *EZH2* mutation. The mutation level increased slightly but never became predominant even at transformation to AML in June 2007. (b) Case #27 presented with ET in June 2006 with a heterozygous c.2069G>A (R690H) mutation. Fourteen months later he progressed to secondary MF at which time the mutation had become homozygous. The mutation remained homozygous at transformation to AML 18 months later. Both cases showed a normal male karyotype throughout their disease course. Retrospective results were obtained from DNA extracted from bone marrow smears or bone marrow-derived fixed cytogenetics suspensions.

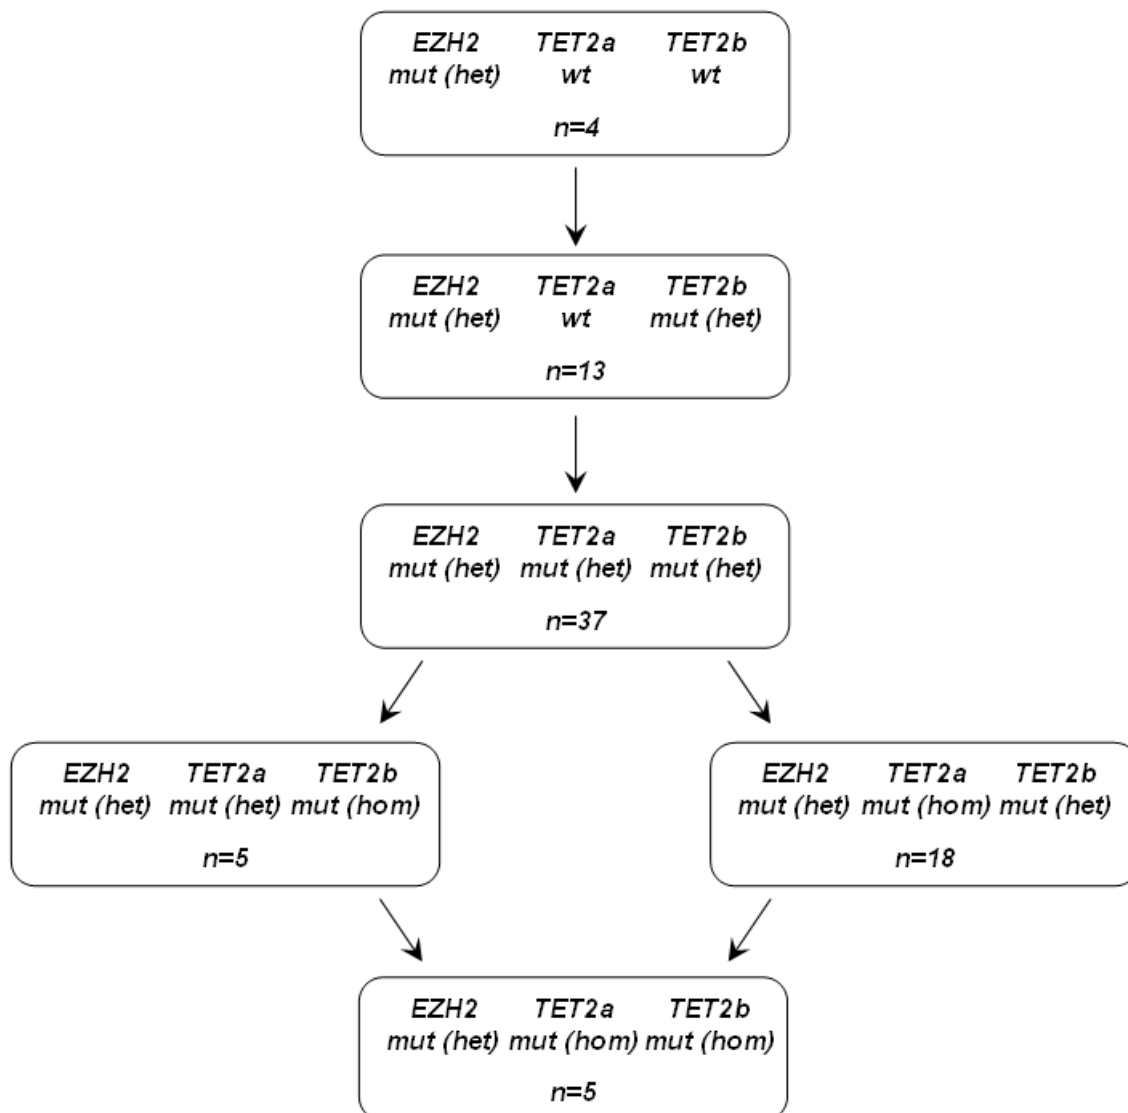

**Supplementary Figure 6.** Analysis of *EZH2* and *TET2* mutations in case #29. Individual CFU-GM were plucked and tested for the *EZH2* c.444\_445het\_insGAA mutation (p.ins\_Glu149) and two *TET2* mutations: c.4171G>GC (designated *TET2a*; p.1262R>R/P) and c.4288C>CA (designated *TET2b*; p.1301A>A/D). The *EZH2* mutation was found in all colonies (but was nevertheless acquired; see Supplementary Figure 2) whereas one or both *TET2* mutations were found in either a heterozygous (het) or homozygous (hom) form in a subset of colonies, thus indicating that the *EZH2* mutation preceded both *TET2* mutations.



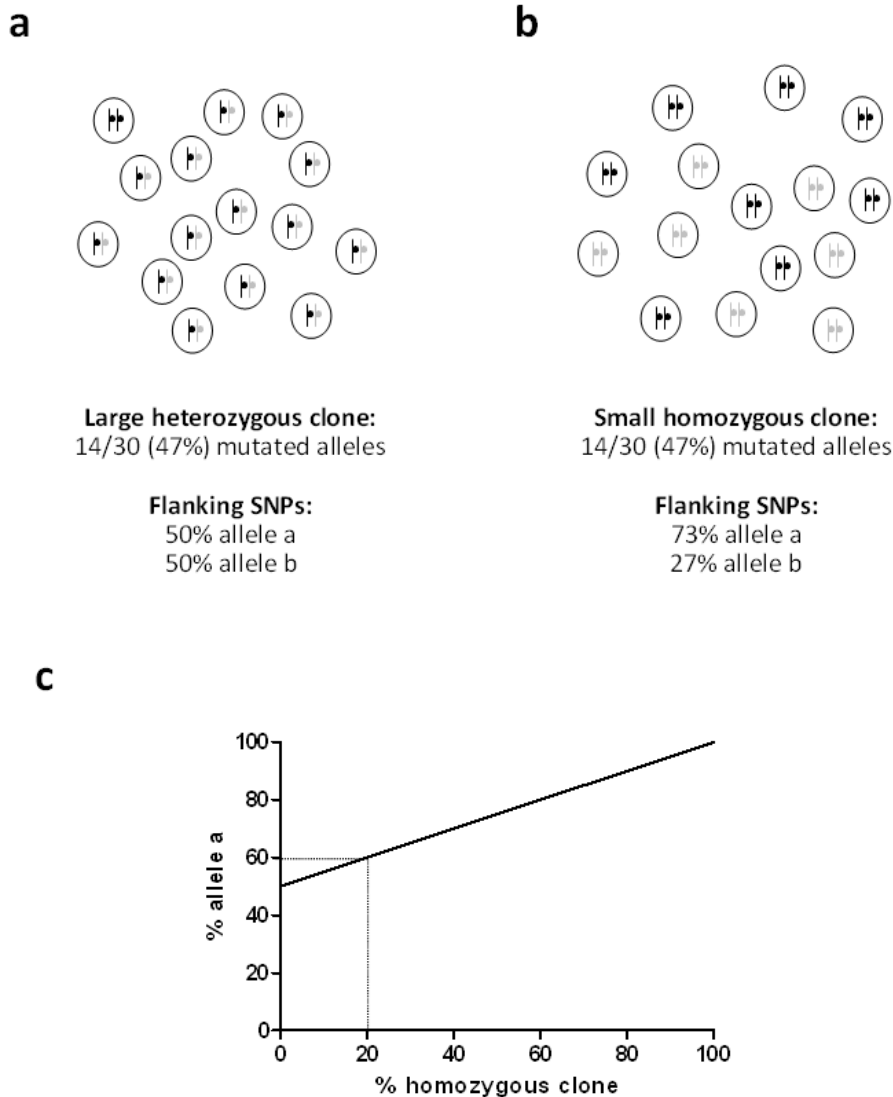

**Supplementary Figure 7.** Detection of small homozygous clones using flanking SNPs. Panel A illustrates a case with a large heterozygous mutant clone and panel B illustrates a case with a small homozygous clone brought about through acquired UPD. Fifteen cells with two chromosomes (wild type, black; mutant, grey) each are shown for each clone. The proportion of mutant: wild type chromosomes is identical in both scenarios and thus measurement of the mutation level cannot distinguish between them. Measurement of the allele ratios of flanking SNPs, however, clearly distinguishes the two. C. Graph illustrating the relationship between homozygous clone size and skewed allele ratios of heterozygous flanking SNPs. Pyrosequencing can reliably detect differences in allelic ratios of 10% and therefore a homozygous clone that comprises at 20% or more of the total cell population can be detected. The percentage of mutant alleles depends on the size of both the homozygous and the heterozygous mutated clones, but in the extreme situation of 80% normal cells, 20% homozygous and 0% heterozygous mutated cells the total percentage of mutated alleles is only 20%. Thus, measurement of flanking SNPs can detect a small homozygous clone in cases with only  $\geq 20\%$  mutated alleles.

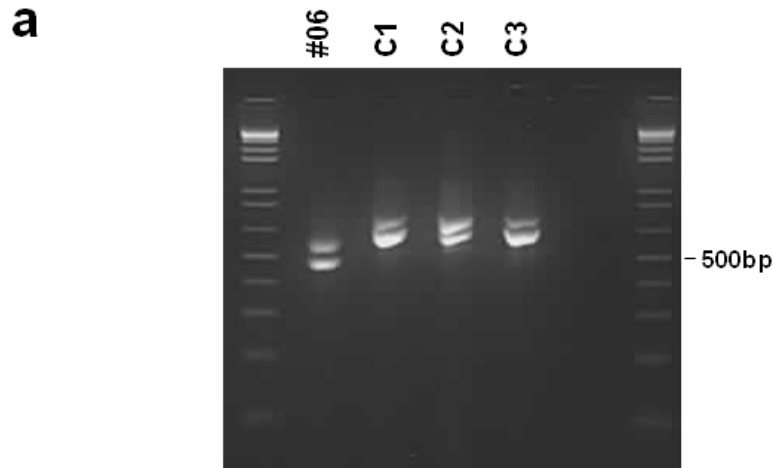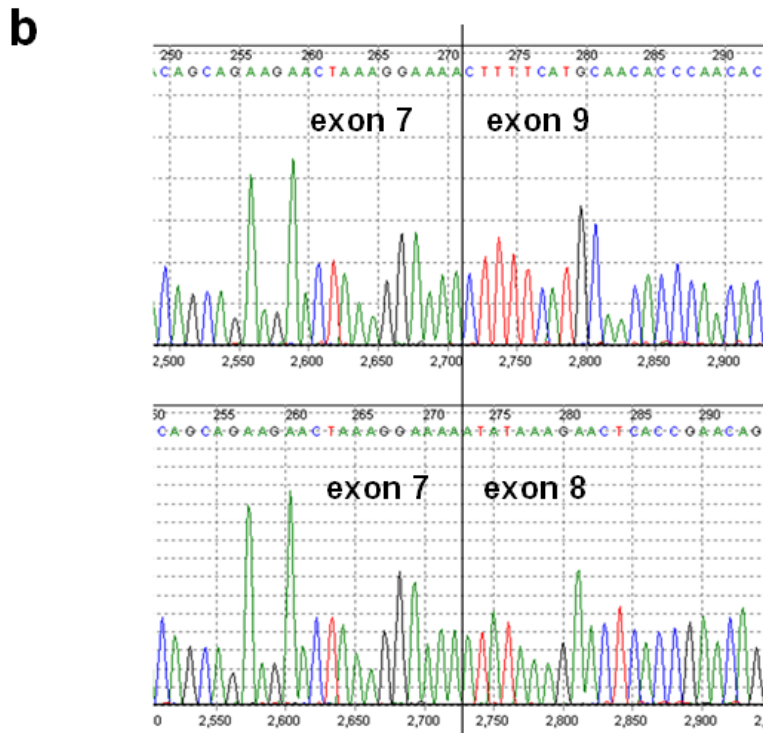

**Supplementary Figure 8.** Analysis of a candidate splicing mutation. Case #6 had a deletion of an 'A' 2bp prior to exon 8. (A) RT-PCR amplification using primers to exon 6 (5'-GGAGTTGGTGAATGCCCTTG-3') and exon 10 (5'-CCCCGTTTCAGTCCCTGCTT-3') produced smaller size bands for #06 compared to three control MPNs without *EZH2* mutations (C1-C3). (B) Sequence analysis showed the smaller bands in #06 were a consequence of skipping of exon 8. Each case showed a double band as a consequence of the inclusion or exclusion of an alternatively spliced exon:

agCCACTCCTACCTAGGA ACTAAATGGGTATATATTGCCTGTTGGATTTGGACAGAAGATTCATTGAATGGCACCTGCAGAAGgt.

This exon is absent from EZH2-004 (ENST00000320356) but is present in EZH2-003 (ENST00000492143).

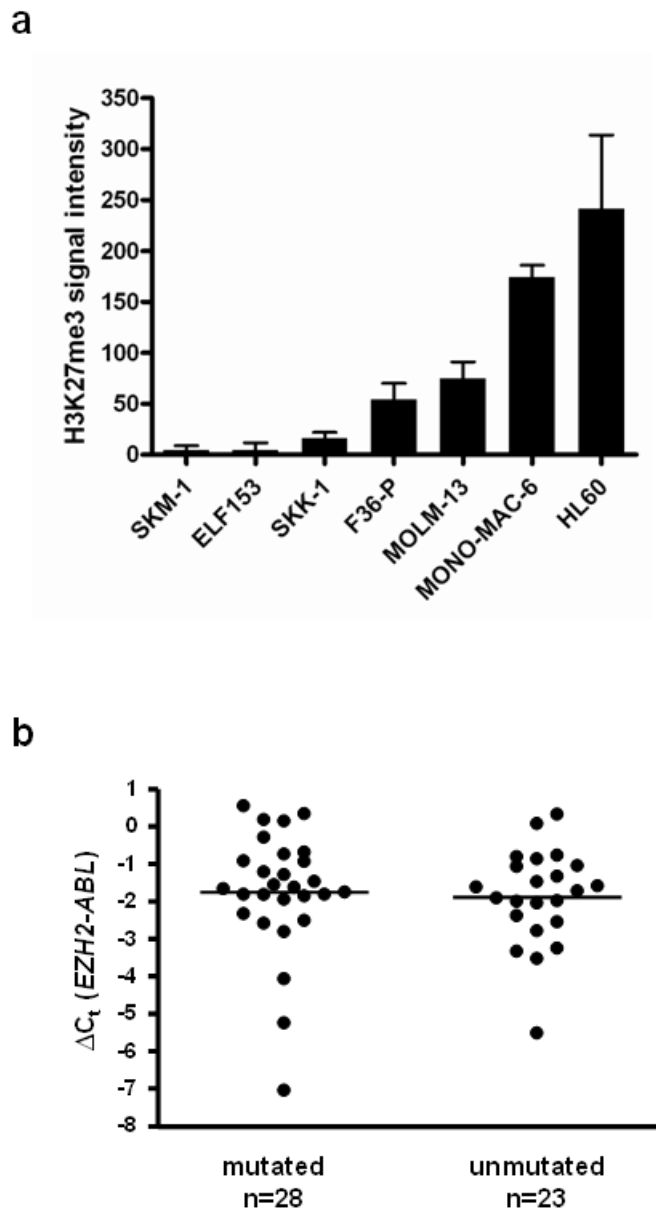

**Supplementary Figure 9.** Levels of H3K27me3 in cell lines and expression levels of *EZH2* in patients. (A) Dot blot analysis of H3K27me3 levels in cell lines. SKM-1 and ELF153 had *EZH2* mutations; all other lines had wild type *EZH2*. (B) *EZH2* mRNA levels in mutated and unmutated patients were analyzed by real time quantitative PCR and normalized to expression of *ABL*. No difference in expression was seen between the two groups.

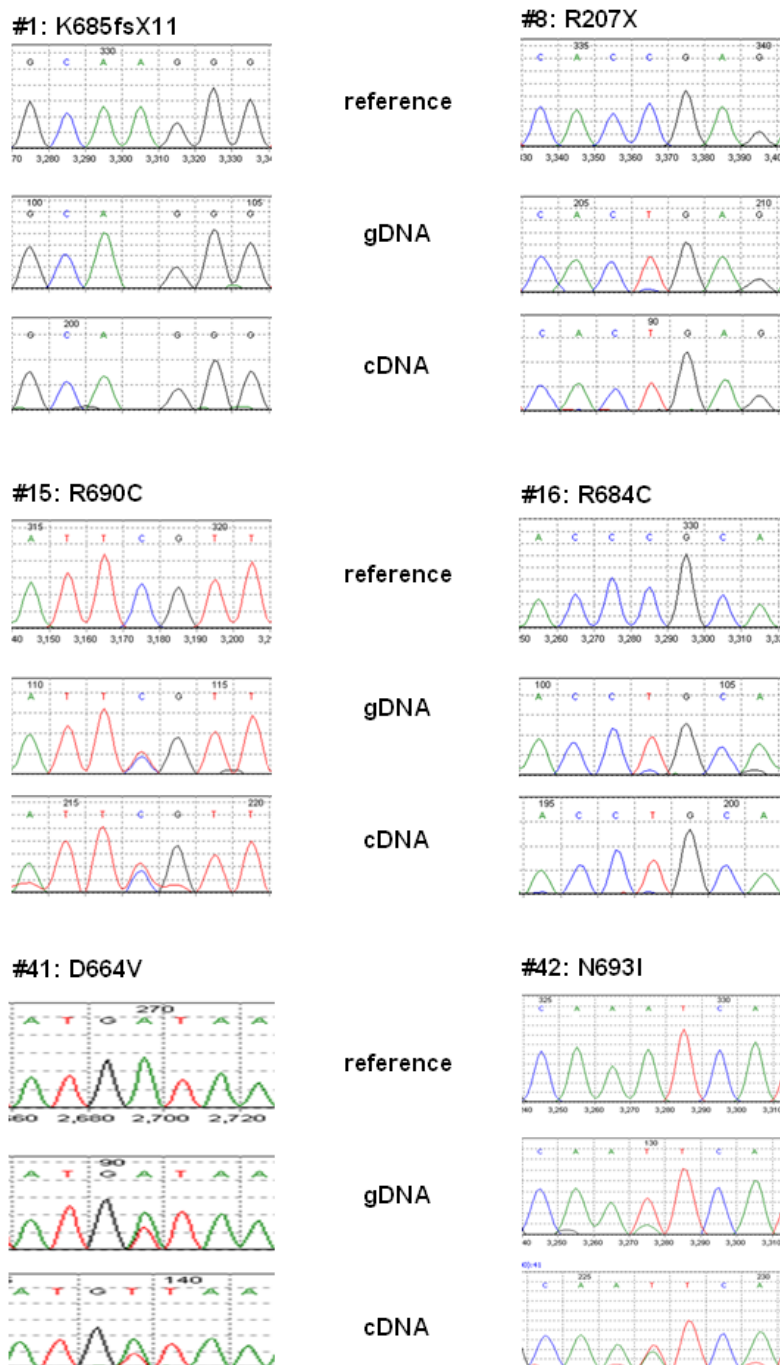

**Supplementary Figure 10.** *EZH2* mutants are expressed. Sequence traces are shown for 6 cases (two with frameshift mutations, four with missense mutations). For each case the top trace is the *EZH2* reference sequence, gDNA is the sequence of the relevant exon amplified from genomic DNA and cDNA is the corresponding region amplified using primers specific for cDNA.
